# Supplementary material for: Regulation of the stem‑like properties of estrogen receptor‑positive breast cancer cells through NR2E3/NR2C2 signaling
Source: PubMed Central journal article supplement — Exp Ther Med. 2023 Aug 22;26(4):474. doi: 10.3892/etm.2023.12173 (PMC10469576; doi:10.3892/etm.2023.12173), 2023-08-22

Figure S1. (A) Cytotoxicity of sh1, sh2 and sh3 targeting nuclear receptor subfamily 2 group E member 3 to MCF7 cells was detected using the MTT assay. (B) Statistical analysis of wound healing rate of the data presented in Fig. 2E. Nc, negative control; ns, not significant; sh, short hairpin RNA. \*P<0.05 and \*\*P<0.01.

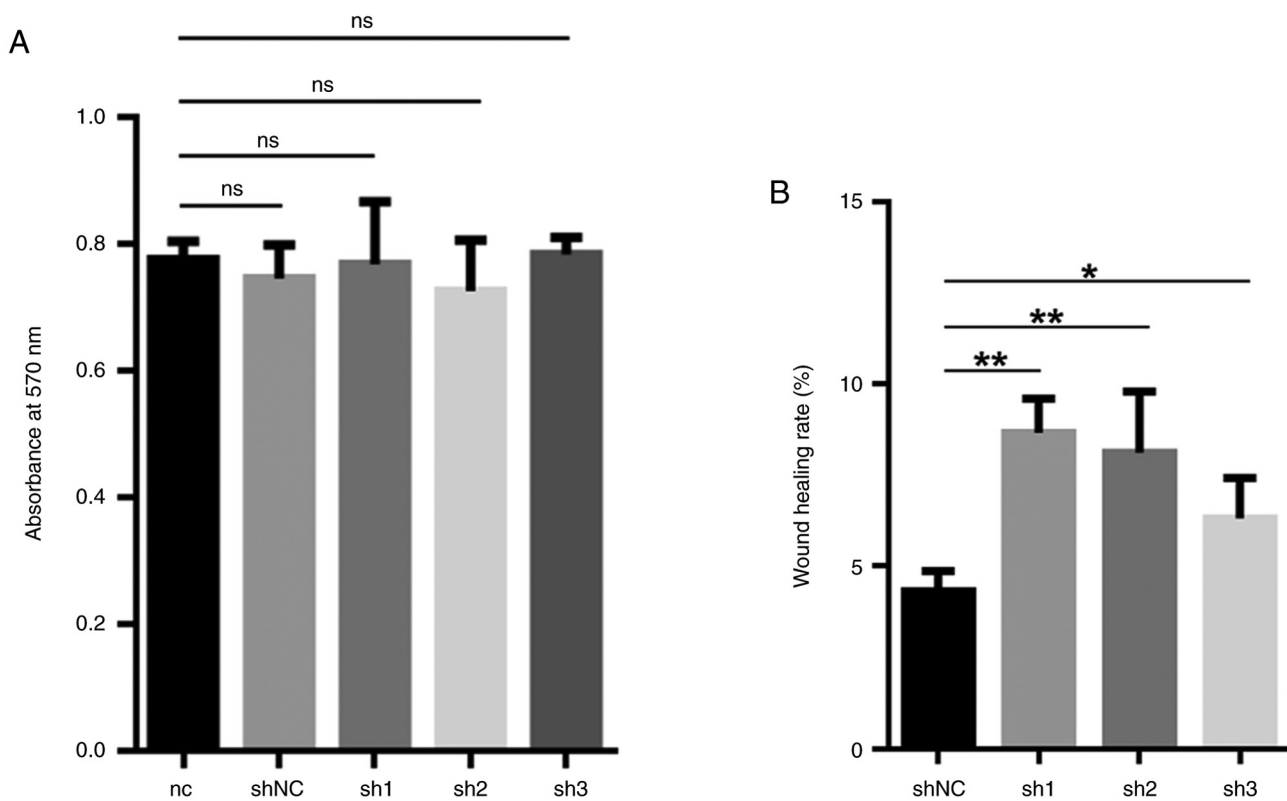

Figure S2. (A) Statistical analysis of colony formation of the data presented in Fig. 2F. (B) Protein expression levels of *nr2e3* were detected in parental and paclitaxel-resistant MCF7 cells by western blotting. GAPDH was used as the endogenous control. NR2E3, nuclear receptor subfamily 2 group E member 3; PR, paclitaxel-resistant; sh, short hairpin RNA; \*P<0.05 and \*\*P<0.01.

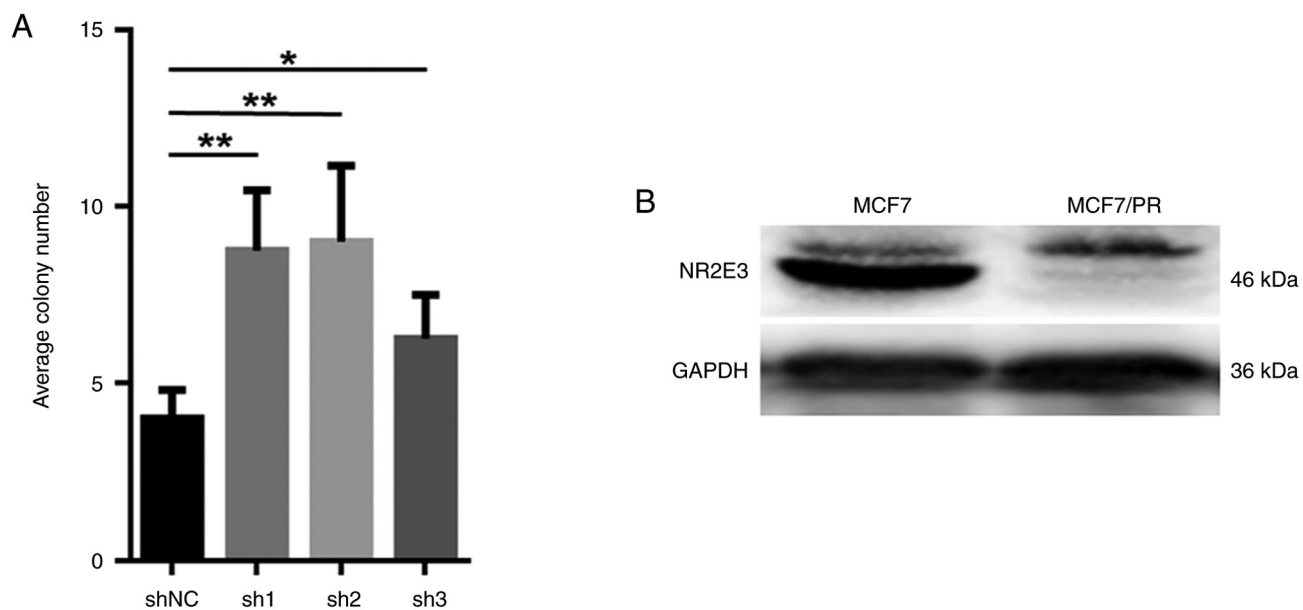

Figure S3. Statistical analysis of the relative protein content of (A) E-cadherin, (B) N-cadherin, (C) VIMENTIN and (D) SLUG in Fig. 3B. \*P<0.05, \*\*P<0.01 and \*\*\*P<0.001. sh, short hairpin RNA.

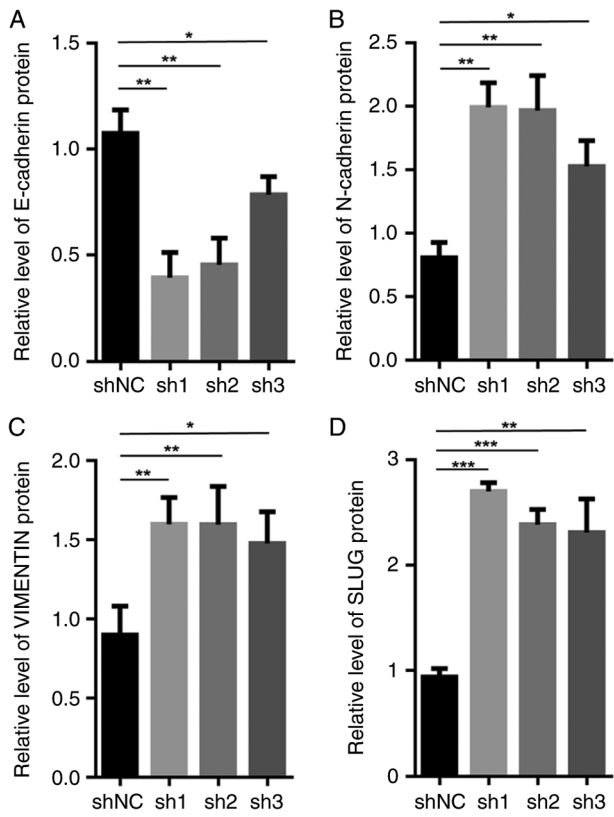

Figure S4. Evaluation of the correlation of *nr2e3* mRNA expression with the mRNA levels of (A) *thra*, (B) *esrra*, (C) *hnf4a* and (D) *ppara* in ER<sup>+</sup> breast adenoma samples. Data was provided by The Cancer Genome Atlas database. BC, breast cancer; ER, estrogen receptor; NR2E3, nuclear receptor subfamily 2 group E member 3; THRA, thyroid hormone receptor  $\alpha$ ; ESRRA, estrogen related receptor  $\alpha$ ; HNF4A, hepatocyte nuclear factor 4 $\alpha$ ; PPARA, peroxisome proliferator activated receptor  $\alpha$ .

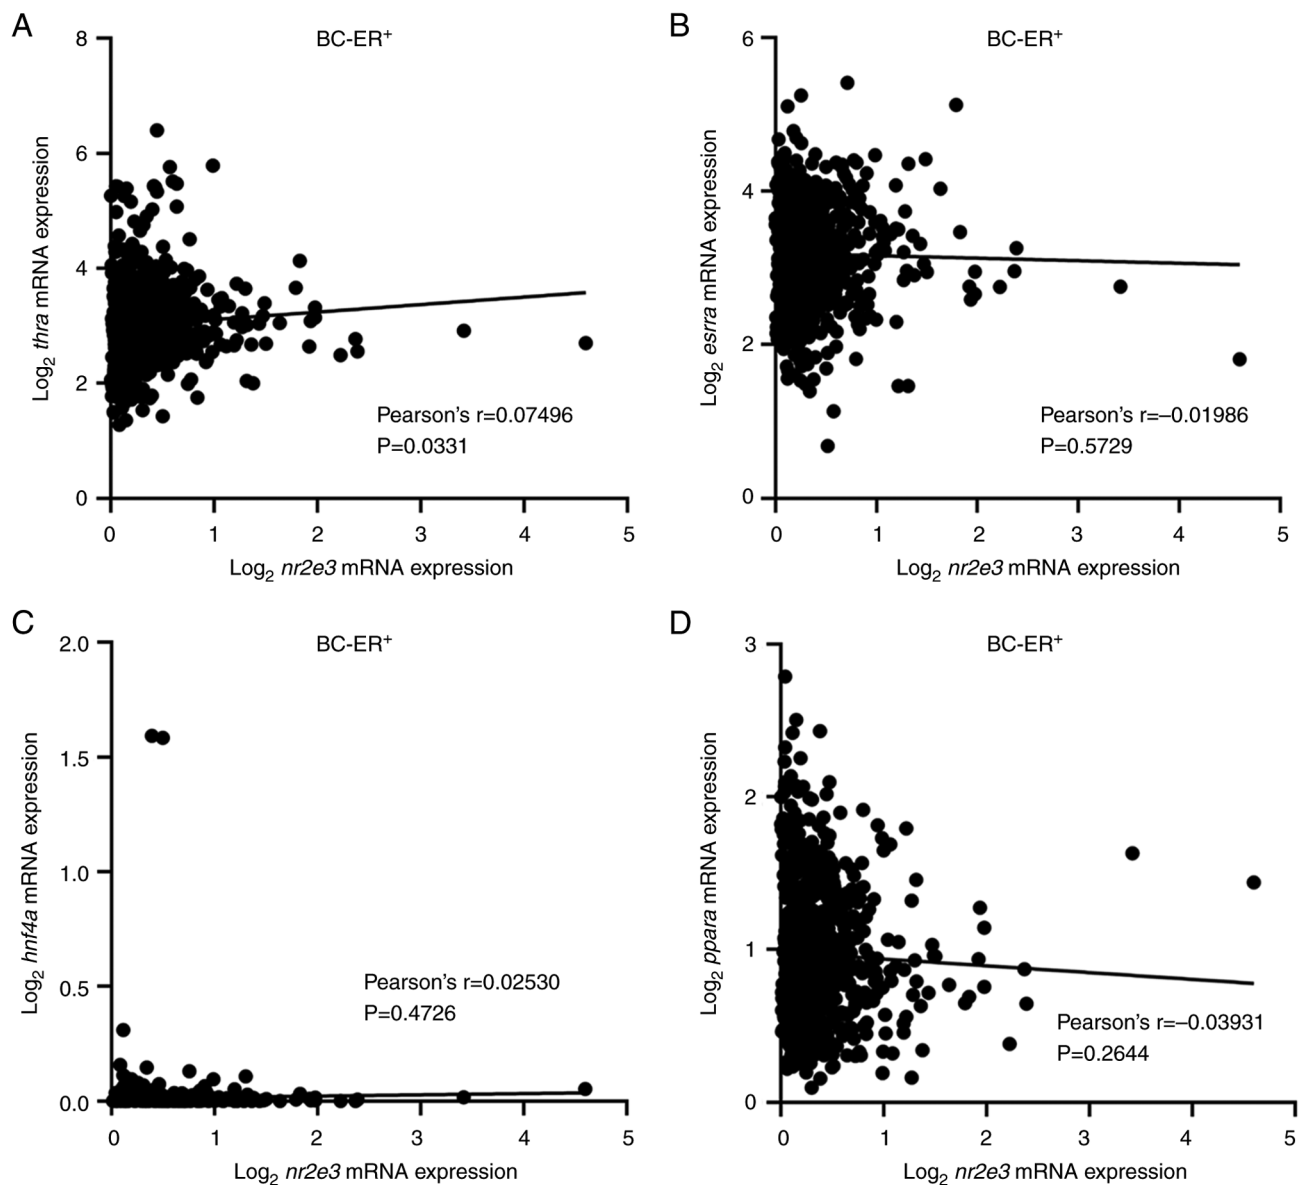

Figure S5. Predicted binding sites of nuclear receptor subfamily 2 group E member 3 on the proximal promoter of the nuclear receptor subfamily 2 group C member 2 gene.

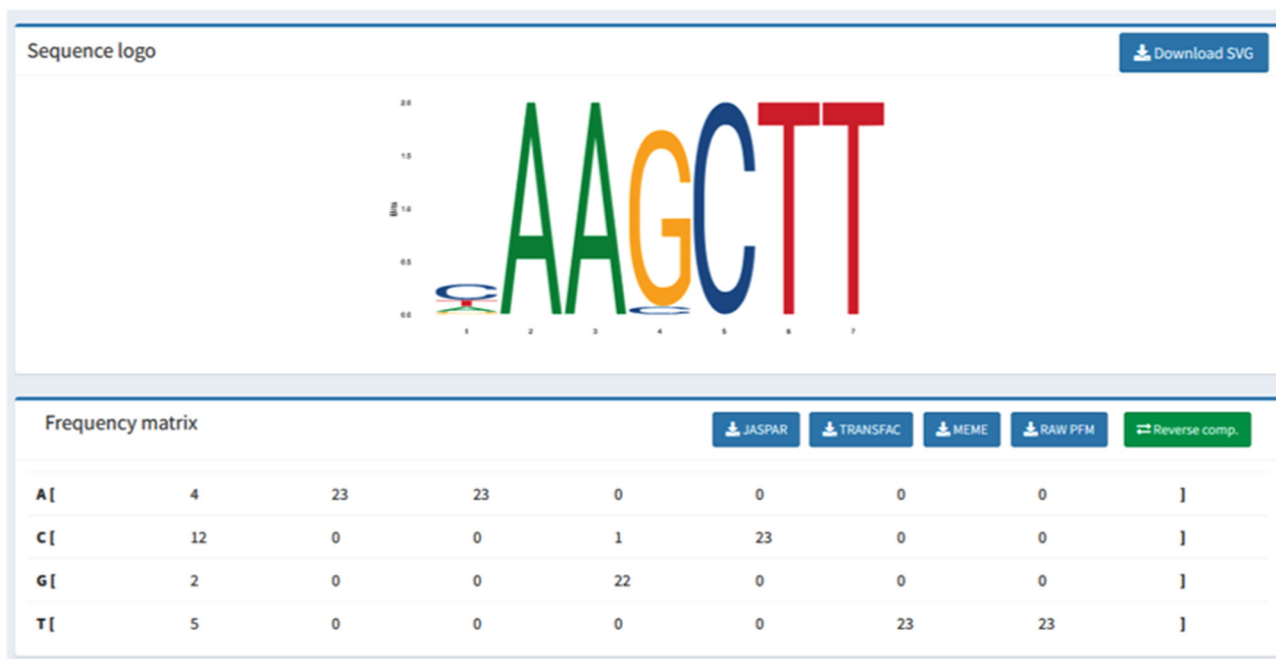

Figure S6. Protein expression of *nr2c2* was detected in parental and *nr2c2* over-expressed MCF7 cells using a western blotting experiment. GAPDH served as the endogenous control. Untransfected, parental MCF7 cells. NR2C2, nuclear receptor subfamily 2 group C member 2.

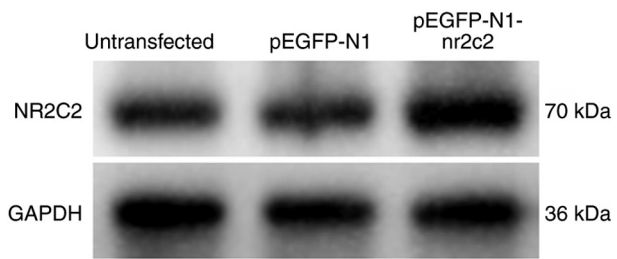

Supplement: Supplementary_Data.pdf [file Supplementary_Data.pdf]
